# Supplementary material for: Hurricane Irma: an unprecedented event over the last 3700 years? Geomorphological changes and sedimentological record in Codrington Lagoon, Barbuda
Source: Copernicus journal article supplement (doi:10.5194/nhess-2022-262), 2023-02-14
Supplement: Supplementary file 1 [file Foraminifera_observations.xlsx]

## Sheet: BARB1-18-01
Sample top depth (cm)	Sample bottom depth (cm)	Pseudotriculina rotunda	Quinqueloculina lamarckiana	Archaias angulatus	Clavulina difformis	Valvulina oviedoiana	Monalysidium acicularis	Laevipeneroplis proteus	Asterigerina carinata	Miliolinella fichteliana	Elphidium lanieri	Sorites marginalis	Peneroplis pertusus	Articulina pacifia	Ammonia tepida	Quinqueloculina bosciana	Pseudohauerinella occidentalis	Elphidium discoidale	Quinqueloculina limbata	Nonionoides grateloupi	Rotorbis auberii	Cornuspira sp.1	Quinqueloculina polygona	Quinqueloculina sclerotica	Quinqueloculina seminula	Planispirinella exigua	Pyrgo sp.1	Pyrgo elonga	Miliolinella subrontunda	Criboelphidium excavatum	Triloculina trigonula	Lachlanella carinata	Quinqueloculina agglutinans	Borelis pulchra	Elphidium sp.1	Quinqueloculina subpoeyana
2	3	4	4	3	2	1	1	2	1	0	1	2	1	1	1	4	1	0	0	0	0	0	0	0	2	0	0	0	0	0	0	0	0	0	0	2
11	12	5	3	4	0	1	0	1	0	1	0	2	1	1	2	4	0	1	2	1	0	1	2	0	0	0	0	0	2	1	0	0	0	0	0	1
22	23	4	2	4	1	1	0	1	0	1	0	2	1	1	1	4	0	1	2	1	1	1	2	1	0	2	1	0	3	0	1	0	0	0	1	1
29	30	2	0	2	0	0	0	1	0	0	1	0	0	1	1	0	0	1	2	0	0	1	2	0	2	0	0	0	0	0	0	0	0	0	0	0
38	39	3	3	2	0	0	0	1	0	0	0	0	0	0	0	4	0	0	2	0	0	0	0	1	0	0	0	0	2	0	0	0	0	0	0	0
45	46	3	2	4	0	0	0	0	0	0	0	0	0	0	0	0	0	0	0	0	0	0	3	3	0	0	0	0	0	0	0	0	0	0	0	0
49	50	4	2	5	0	0	0	1	0	0	0	1	0	0	0	0	0	0	2	0	0	0	3	0	0	0	0	0	2	0	0	2	2	0	0	1
54	55	4	4	5	0	0	0	1	0	1	1	0	2	1	2	3	0	1	4	1	1	0	3	3	2	1	0	0	2	0	0	0	2	0	0	0
58	59	4	3	5	0	0	0	1	0	0	1	0	0	1	1	4	0	1	4	0	1	1	3	2	0	1	0	1	4	2	0	2	0	0	0	0
62	63	5	4	5	0	0	0	2	0	0	0	1	1	1	1	3	0	0	2	1	1	0	2	0	2	0	0	0	2	0	0	2	2	0	0	1
66	67	4	4	5	1	0	0	3	0	0	0	1	2	1	1	0	0	0	4	0	1	1	0	2	4	0	0	1	0	1	0	2	4	0	0	0
73	74	5	5	5	0	0	0	1	0	0	0	1	1	1	0	0	0	0	2	0	0	0	3	2	2	1	0	0	0	0	0	2	2	1	0	0
80	81	5	3	3	0	0	0	1	0	0	0	0	0	1	0	4	0	0	3	0	0	0	3	2	2	0	0	0	2	0	0	2	0	0	0	1
89	90	4	4	4	0	1	0	1	0	0	0	0	0	1	0	4	0	0	2	0	0	0	2	2	0	0	0	0	2	0	0	2	2	0	0	1
97	98	5	5	5	1	2	0	2	0	0	0	1	1	1	1	3	0	2	4	0	0	0	2	2	0	0	0	0	2	0	0	2	2	0	0	0
102	103	4	4	3	0	0	0	2	0	0	0	2	0	1	1	4	0	0	0	0	1	0	3	3	2	0	0	0	2	0	0	2	2	0	0	0
106	107	2	2	1	0	0	0	2	0	0	0	1	0	0	0	3	0	0	0	0	0	0	0	1	2	0	0	0	2	0	0	0	2	0	0	1
115	116	5	2	2	2	0	0	0	0	0	0	0	0	0	0	0	0	0	1	0	1	0	1	2	5	0	0	0	2	0	0	0	0	0	0	1
122	123	1	0	0	0	0	0	0	0	0	0	0	0	0	0	1	0	0	0	0	0	0	0	0	4	0	0	0	0	0	0	0	0	0	0	0
	Abundance of foraminifera (125–500 μm and >500 μm fractions) according to a semi-quantitative scale: 0 = no individuals, 1 = 1 to 2 individuals, 2 = 3 to 5 individuals, 3 = 6 to 15 individuals, 4 = 16 to 40 individuals, 5 = >41 individuals.

## Sheet: BARB1-18-05
Sample top depth (cm)	Sample bottom depth (cm)	Quinqueloculina agglutinans	Laevipeneroplis proteus	Pseudotriloculina rotunda	Archaias angulatus	Sorites marginalis	Clavulina difformis	Valvulina oviedoiana	Quinqueloculina polygona	Textularia agglutinans	Quinqueloculina limbata	Quinqueloculina seminula	Quinqueloculina bosciana	Criboelphidium excavatum	Quinqueloculina sclerotica	Planispirinella exigua	Asterigina carinata	Cymbaloporetta squammosa	Pseudohauerinella occidentalis	Amphistegina sp.	Bolivina sp.	Miliolinella subrotunda	Peneroplis pertusus	Cornuspira sp.	Quinqueloculina lamarckiana	Ammonia tepida	Miliolinella fichteliana	Rotorbis auberii	Lachlanella carinata	Elphidium lanieri	Cymbaloporetta bradyi	Spiroculina antillarum	Articulina pacifica	Nonionoides grateloupii	Triloculina trigonula	Quinqueloculina subpoeyana
2	3	3	1	3	4	2	2	3	4	1	1	3	3	1	4	1	1	1	1	1	1	3	0	0	0	0	1	0	0	0	0	0	0	0	0	0
10	11	3	1	3	4	3	1	0	3	0	3	2	3	1	4	2	0	0	0	0	0	2	1	1	2	1	0	0	1	0	0	0	0	0	0	0
20	21	3	1	2	5	0	0	2	3	0	3	5	4	1	4	1	0	0	0	0	0	2	0	1	3	0	1	1	0	0	0	0	0	0	0	0
30	31	1	2	3	5	0	1	1	0	0	2	5	0	1	3	0	0	0	0	0	0	0	0	1	2	1	0	0	2	0	0	0	0	0	0	0
41	42	2	2	3	5	0	0	0	1	0	2	0	3	0	4	0	0	0	0	0	0	2	0	0	2	1	0	1	2	1	0	0	0	0	0	0
50	51	1	2	4	3	0	0	0	1	0	3	2	0	0	1	0	0	0	0	0	0	0	0	0	2	1	3	1	3	0	0	0	0	0	1	0
61	62	2	2	5	4	1	0	0	1	0	1	0	3	0	3	0	0	0	0	0	0	0	0	2	3	0	3	2	2	0	1	1	2	1	0	0
69	70	3	2	4	5	0	0	0	1	0	2	0	3	2	4	0	0	0	0	0	0	2	0	0	4	0	2	2	2	0	0	1	2	1	1	0
78	79	0	0	0	0	0	0	0	0	0	0	3	0	0	0	0	0	0	0	0	0	0	1	2	0	2	0	1	0	0	0	0	0	0	0	2
90	91	0	0	0	0	0	0	0	0	0	0	1	0	0	0	0	0	0	0	0	0	0	0	0	1	0	0	0	0	0	0	0	0	0	0	0
99	100	0	0	0	0	0	0	0	0	0	2	2	3	0	0	0	0	0	0	0	0	0	0	0	0	0	0	0	0	0	0	0	0	0	0	1
109	110	0	0	0	0	0	0	0	0	0	0	0	0	0	0	0	0	0	0	0	0	0	0	0	0	0	0	0	0	0	0	0	0	0	0	0
121	122	0	0	0	2	0	0	0	0	0	0	2	0	0	0	0	0	0	0	0	0	0	0	0	2	0	0	0	0	0	0	0	0	0	0	0
		Abundance of foraminifera (125–500 μm and >500 μm fractions) according to a semi-quantitative scale: 0 = no individuals, 1 = 1 to 2 individuals, 2 = 3 to 5 individuals, 3 = 6 to 15 individuals, 4 = 16 to 40 individuals, 5 = >41 individuals.

## Sheet: Feuil1
Sample top depth (cm)	2	11	22	29	38	45	49	54	58	62	66	73	80	89	97	102	106	115	122
Sample bottom depth (cm)	3	12	23	30	39	46	50	55	59	63	67	74	81	90	98	103	107	116	123
Pseudotriculina rotunda	4	5	4	2	3	3	4	4	4	5	4	5	5	4	5	4	2	5	1
Quinqueloculina lamarckiana	4	3	2	0	3	2	2	4	3	4	4	5	3	4	5	4	2	2	0
Archaias angulatus	3	4	4	2	2	4	5	5	5	5	5	5	3	4	5	3	1	2	0
Clavulina difformis	2	0	1	0	0	0	0	0	0	0	1	0	0	0	1	0	0	2	0
Valvulina oviedoiana	1	1	1	0	0	0	0	0	0	0	0	0	0	1	2	0	0	0	0
Monalysidium acicularis	1	0	0	0	0	0	0	0	0	0	0	0	0	0	0	0	0	0	0
Laevipeneroplis proteus	2	1	1	1	1	0	1	1	1	2	3	1	1	1	2	2	2	0	0
Asterigerina carinata	1	0	0	0	0	0	0	0	0	0	0	0	0	0	0	0	0	0	0
Miliolinella fichteliana	0	1	1	0	0	0	0	1	0	0	0	0	0	0	0	0	0	0	0
Elphidium lanieri	1	0	0	1	0	0	0	1	1	0	0	0	0	0	0	0	0	0	0
Sorites marginalis	2	2	2	0	0	0	1	0	0	1	1	1	0	0	1	2	1	0	0
Peneroplis pertusus	1	1	1	0	0	0	0	2	0	1	2	1	0	0	1	0	0	0	0
Articulina pacifia	1	1	1	1	0	0	0	1	1	1	1	1	1	1	1	1	0	0	0
Ammonia tepida	1	2	1	1	0	0	0	2	1	1	1	0	0	0	1	1	0	0	0
Quinqueloculina bosciana	4	4	4	0	4	0	0	3	4	3	0	0	4	4	3	4	3	0	1
Pseudohauerinella occidentalis	1	0	0	0	0	0	0	0	0	0	0	0	0	0	0	0	0	0	0
Elphidium discoidale	0	1	1	1	0	0	0	1	1	0	0	0	0	0	2	0	0	0	0
Quinqueloculina limbata	0	2	2	2	2	0	2	4	4	2	4	2	3	2	4	0	0	1	0
Nonionoides grateloupi	0	1	1	0	0	0	0	1	0	1	0	0	0	0	0	0	0	0	0
Rotorbis auberii	0	0	1	0	0	0	0	1	1	1	1	0	0	0	0	1	0	1	0
Cornuspira sp.1	0	1	1	1	0	0	0	0	1	0	1	0	0	0	0	0	0	0	0
Quinqueloculina polygona	0	2	2	2	0	3	3	3	3	2	0	3	3	2	2	3	0	1	0
Quinqueloculina sclerotica	0	0	1	0	1	3	0	3	2	0	2	2	2	2	2	3	1	2	0
Quinqueloculina seminula	2	0	0	2	0	0	0	2	0	2	4	2	2	0	0	2	2	5	4
Planispirinella exigua	0	0	2	0	0	0	0	1	1	0	0	1	0	0	0	0	0	0	0
Pyrgo sp.1	0	0	1	0	0	0	0	0	0	0	0	0	0	0	0	0	0	0	0
Pyrgo elonga	0	0	0	0	0	0	0	0	1	0	1	0	0	0	0	0	0	0	0
Miliolinella subrontunda	0	2	3	0	2	0	2	2	4	2	0	0	2	2	2	2	2	2	0
Criboelphidium excavatum	0	1	0	0	0	0	0	0	2	0	1	0	0	0	0	0	0	0	0
Triloculina trigonula	0	0	1	0	0	0	0	0	0	0	0	0	0	0	0	0	0	0	0
Lachlanella carinata	0	0	0	0	0	0	2	0	2	2	2	2	2	2	2	2	0	0	0
Quinqueloculina agglutinans	0	0	0	0	0	0	2	2	0	2	4	2	0	2	2	2	2	0	0
Borelis pulchra	0	0	0	0	0	0	0	0	0	0	0	1	0	0	0	0	0	0	0
Elphidium sp.1	0	0	1	0	0	0	0	0	0	0	0	0	0	0	0	0	0	0	0
Quinqueloculina subpoeyana	2	1	1	0	0	0	1	0	0	1	0	0	1	1	0	0	1	1	0

## Sheet: Feuil2
Sample top depth (cm)	2	10	20	30	41	50	61	69	78	90	99	109	121
Sample bottom depth (cm)	3	11	21	31	42	51	62	70	79	91	100	110	122
Quinqueloculina agglutinans	3	3	3	1	2	1	2	3	0	0	0	0	0
Laevipeneroplis proteus	1	1	1	2	2	2	2	2	0	0	0	0	0
Pseudotriloculina rotunda	3	3	2	3	3	4	5	4	0	0	0	0	0
Archaias angulatus	4	4	5	5	5	3	4	5	0	0	0	0	2
Sorites marginalis	2	3	0	0	0	0	1	0	0	0	0	0	0
Clavulina difformis	2	1	0	1	0	0	0	0	0	0	0	0	0
Valvulina oviedoiana	3	0	2	1	0	0	0	0	0	0	0	0	0
Quinqueloculina polygona	4	3	3	0	1	1	1	1	0	0	0	0	0
Textularia agglutinans	1	0	0	0	0	0	0	0	0	0	0	0	0
Quinqueloculina limbata	1	3	3	2	2	3	1	2	0	0	2	0	0
Quinqueloculina seminula	3	2	5	5	0	2	0	0	3	1	2	0	2
Quinqueloculina bosciana	3	3	4	0	3	0	3	3	0	0	3	0	0
Criboelphidium excavatum	1	1	1	1	0	0	0	2	0	0	0	0	0
Quinqueloculina sclerotica	4	4	4	3	4	1	3	4	0	0	0	0	0
Planispirinella exigua	1	2	1	0	0	0	0	0	0	0	0	0	0
Asterigina carinata	1	0	0	0	0	0	0	0	0	0	0	0	0
Cymbaloporetta squammosa	1	0	0	0	0	0	0	0	0	0	0	0	0
Pseudohauerinella occidentalis	1	0	0	0	0	0	0	0	0	0	0	0	0
Amphistegina sp.	1	0	0	0	0	0	0	0	0	0	0	0	0
Bolivina sp.	1	0	0	0	0	0	0	0	0	0	0	0	0
Miliolinella subrotunda	3	2	2	0	2	0	0	2	0	0	0	0	0
Peneroplis pertusus	0	1	0	0	0	0	0	0	1	0	0	0	0
Cornuspira sp.	0	1	1	1	0	0	2	0	2	0	0	0	0
Quinqueloculina lamarckiana	0	2	3	2	2	2	3	4	0	1	0	0	2
Ammonia tepida	0	1	0	1	1	1	0	0	2	0	0	0	0
Miliolinella fichteliana	1	0	1	0	0	3	3	2	0	0	0	0	0
Rotorbis auberii	0	0	1	0	1	1	2	2	1	0	0	0	0
Lachlanella carinata	0	1	0	2	2	3	2	2	0	0	0	0	0
Elphidium lanieri	0	0	0	0	1	0	0	0	0	0	0	0	0
Cymbaloporetta bradyi	0	0	0	0	0	0	1	0	0	0	0	0	0
Spiroculina antillarum	0	0	0	0	0	0	1	1	0	0	0	0	0
Articulina pacifica	0	0	0	0	0	0	2	2	0	0	0	0	0
Nonionoides grateloupii	0	0	0	0	0	0	1	1	0	0	0	0	0
Triloculina trigonula	0	0	0	0	0	1	0	1	0	0	0	0	0
Quinqueloculina subpoeyana	0	0	0	0	0	0	0	0	2	0	1	0	0
